# Supplementary material
Source: MDPI journal article supplement (https://www.mdpi.com/2304-6740/10/12/251)
Supplement: s1 [file s1]

## Supplementary Data

# Structural Study of Model Rhodium(I) Carbonylation Catalysts Activated by Indole-2-/ Indoline-2-Carboxylate Bidentate Ligands and Kinetics of Iodomethane Oxidative Addition

Mohammed A.E. Elmakki<sup>1,2</sup>, Orbett T. Alexander<sup>1</sup>, Gertruida J.S. Venter<sup>1</sup>, Johan A. Venter<sup>1\*</sup> and Andreas Roodt<sup>1\*</sup>

<sup>1</sup>Department of Chemistry, University of the Free State, Box 339, Bloemfontein 9300, South Africa.

<sup>2</sup>Department of Chemistry, Omdurman Islamic University, Box 382, Omdurman 14415, Sudan

\*Correspondence:: azeez77777@gmail.com (M.A.E.E), venterja@ufs.ac.za (J.A.V.), aroodta@gmail.com (A.R.)

## INDEX

|                                                                                                                                                                                                                                                                      |    |
|----------------------------------------------------------------------------------------------------------------------------------------------------------------------------------------------------------------------------------------------------------------------|----|
| Figure S1: ATR IR spectrum of [Rh(indoli)(CO) <sub>2</sub> ] (A1).....                                                                                                                                                                                               | 2  |
| Figure S2: ATR IR spectrum of [Rh(indoli)(CO)(PPh <sub>3</sub> )] (A2).....                                                                                                                                                                                          | 3  |
| Figure S3: ATR IR spectrum of [Rh(indol)(CO) <sub>2</sub> ] (B1) .....                                                                                                                                                                                               | 3  |
| Figure S4: ATR IR spectrum of [Rh(indol)(CO)(PPh <sub>3</sub> )Rh(CO)(PPh <sub>3</sub> ) <sub>2</sub> ] (B2) .....                                                                                                                                                   | 3  |
| Figure S5: <sup>1</sup> H NMR spectrum (DCM) of [Rh(indoli)(CO) <sub>2</sub> ] (A1) .....                                                                                                                                                                            | 4  |
| Figure S6: <sup>13</sup> C NMR spectrum of the IndoliH ligand in Acetonitrile d <sub>3</sub> . The signals 1.1 and 118.2 refer to the deuterated acetonitrile solvent. ....                                                                                          | 4  |
| Figure S7: <sup>13</sup> C NMR spectrum (DCM) of [Rh(indoli)(CO) <sub>2</sub> ] (A1).....                                                                                                                                                                            | 5  |
| Figure S8: <sup>1</sup> H NMR spectrum (DCM) of [Rh(indoli)(CO)(PPh <sub>3</sub> )] (A2).....                                                                                                                                                                        | 5  |
| Figure S9: <sup>13</sup> C NMR spectrum (Acetone-d <sub>6</sub> ) of [Rh(indoli)(CO)(PPh <sub>3</sub> )] (A2) .....                                                                                                                                                  | 6  |
| Figure S10: <sup>31</sup> P NMR spectrum (DCM) of [Rh(indoli)(CO)(PPh <sub>3</sub> )] (A2) .....                                                                                                                                                                     | 6  |
| Figure S11: <sup>1</sup> H NMR spectrum (DCM) of [Rh(indol)(CO) <sub>2</sub> ] (B1) .....                                                                                                                                                                            | 7  |
| Figure S12: <sup>1</sup> H NMR spectrum (DCM) of [Rh(indol')(CO)(PPh <sub>3</sub> )Rh(CO)(PPh <sub>3</sub> ) <sub>2</sub> ] (B2).....                                                                                                                                | 7  |
| Figure S13: <sup>13</sup> C NMR spectrum (Acetone-d <sub>6</sub> ) of IndolH .....                                                                                                                                                                                   | 8  |
| Figure S14: <sup>13</sup> C NMR spectrum (Acetone-d <sub>6</sub> ) of [Rh(indol)(CO) <sub>2</sub> ] (B1).....                                                                                                                                                        | 8  |
| Figure S15: <sup>13</sup> C NMR spectrum (CDCl <sub>3</sub> ) of [Rh(indol')(CO)(PPh <sub>3</sub> )Rh(CO)(PPh <sub>3</sub> ) <sub>2</sub> ] (B2) .....                                                                                                               | 9  |
| Figure S16: <sup>31</sup> P NMR spectrum (DCM) of [Rh(indol')(CO)(PPh <sub>3</sub> )Rh(CO)(PPh <sub>3</sub> ) <sub>2</sub> ] (B2) .....                                                                                                                              | 9  |
| Figure S17: <sup>31</sup> P NMR spectrum (DCM) of (a) <i>trans</i> -[RhI(CO)(PPh <sub>3</sub> ) <sub>2</sub> ] (B4) and (b) <i>trans</i> -[RhClCO)(PPh <sub>3</sub> ) <sub>2</sub> ] .....                                                                           | 10 |
| Figure S18: Eyring plot: <i>k</i> <sub>1</sub> rate constant (DCM): iodomethane oxidative addition to [Rh(indoli)(CO)(PPh <sub>3</sub> )] (A2)..                                                                                                                     | 10 |
| Figure S19: Eyring plot: OA <i>k</i> <sub>1</sub> rate constant to [Rh <sup>1</sup> (Indol')(CO)(PPh <sub>3</sub> )Rh <sup>2</sup> (CO)(PPh <sub>3</sub> ) <sub>2</sub> ] (B2) in dichloromethane..                                                                  | 11 |
| Table S1: Comparison of selected crystallographic data in [Rh1(Indol')(CO)(PPh <sub>3</sub> )-Rh2(CO)(PPh <sub>3</sub> ) <sub>2</sub> ].(CH <sub>3</sub> COCH <sub>3</sub> ) (B2a) with an isostructural thiourea molecule reported by Kemp et al. [Ref see ms]..... | 11 |
| Table S2: Comparison of geometric parameters and crystal data of <i>trans</i> -[Rh(CO)(I)(PPh <sub>3</sub> ) <sub>2</sub> ].(CH <sub>3</sub> COCH <sub>3</sub> ) (B5a) and similar structure found in the literature.....                                            | 12 |

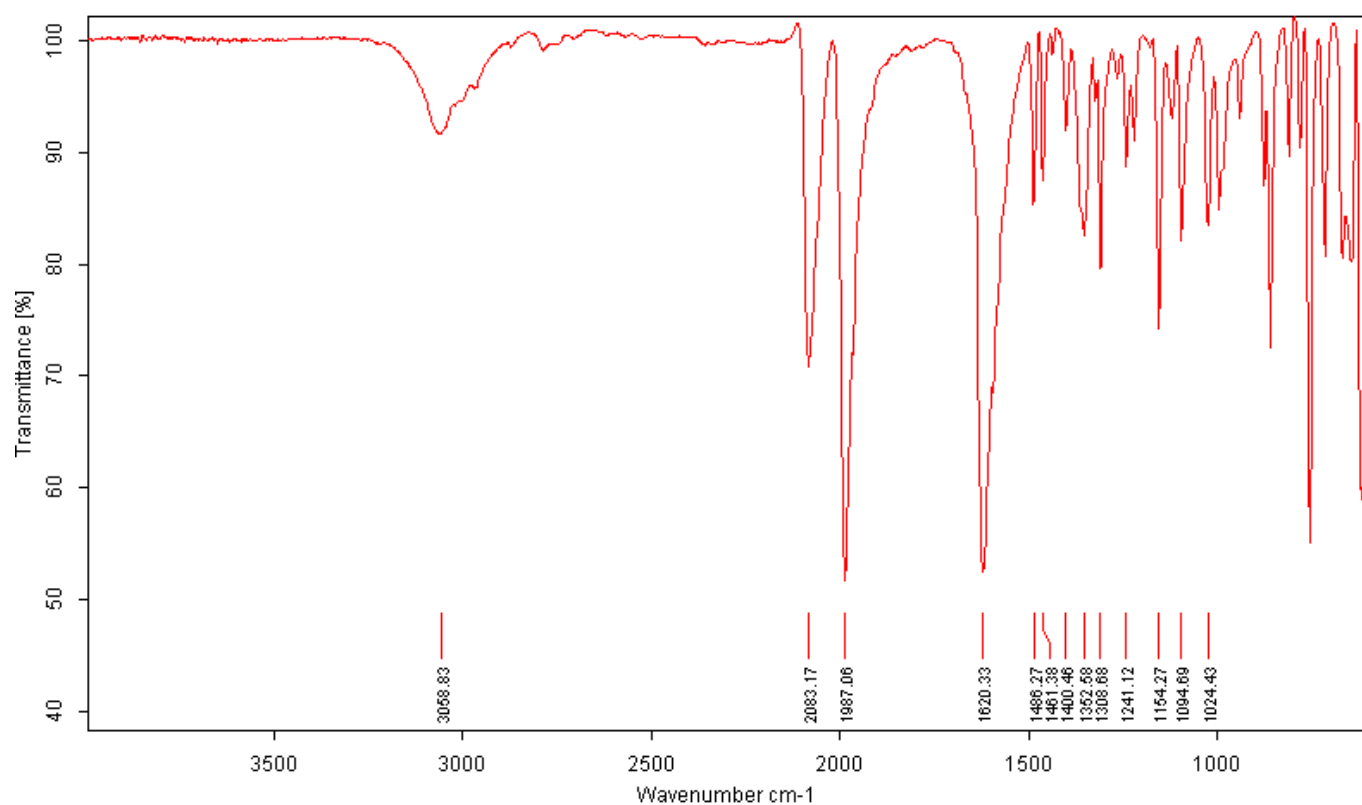

Figure S1: ATR IR spectrum of  $[\text{Rh}(\text{indoli})(\text{CO})_2]$  (A1)

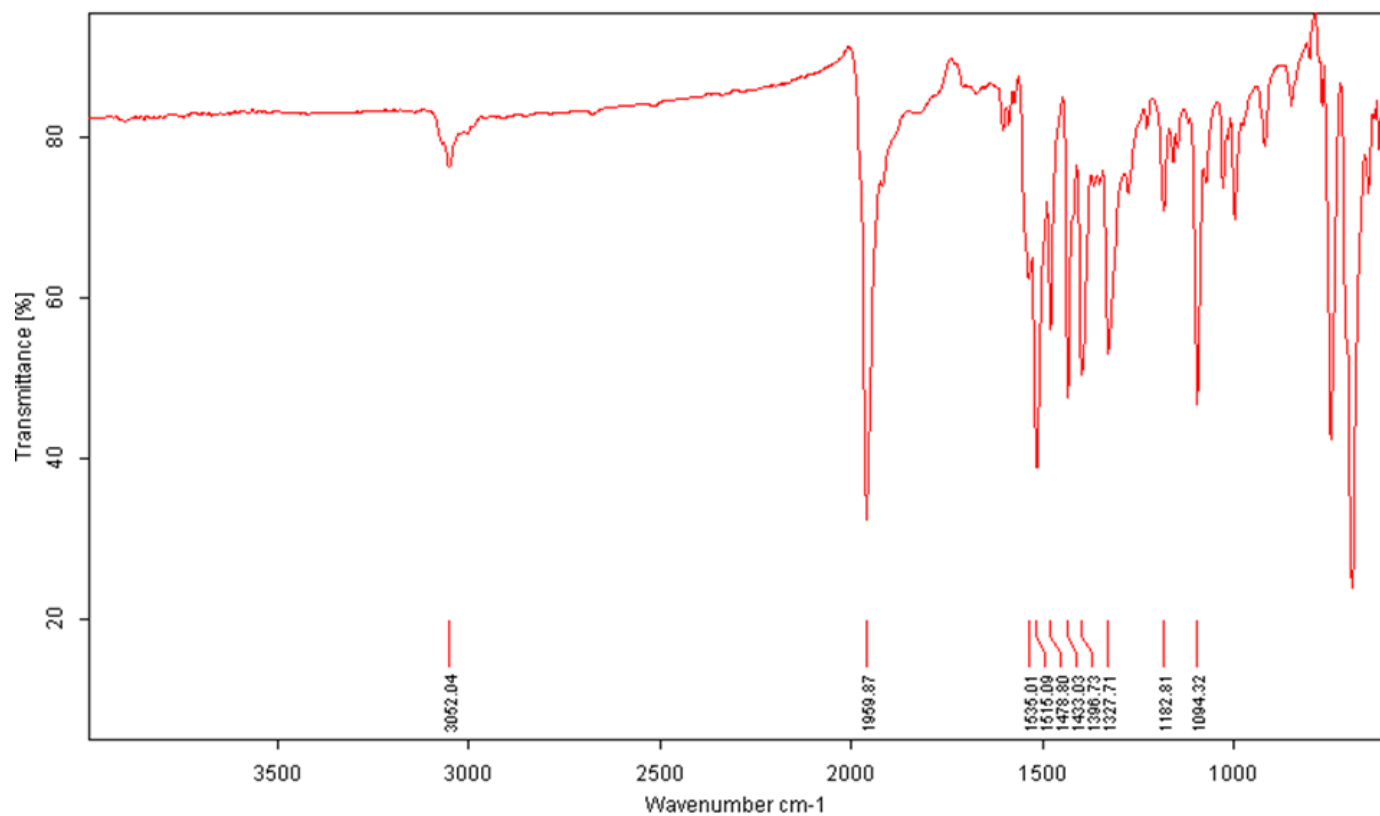

Figure S2: ATR IR spectrum of  $[\text{Rh}(\text{indoli})(\text{CO})(\text{PPh}_3)]$  (A2)

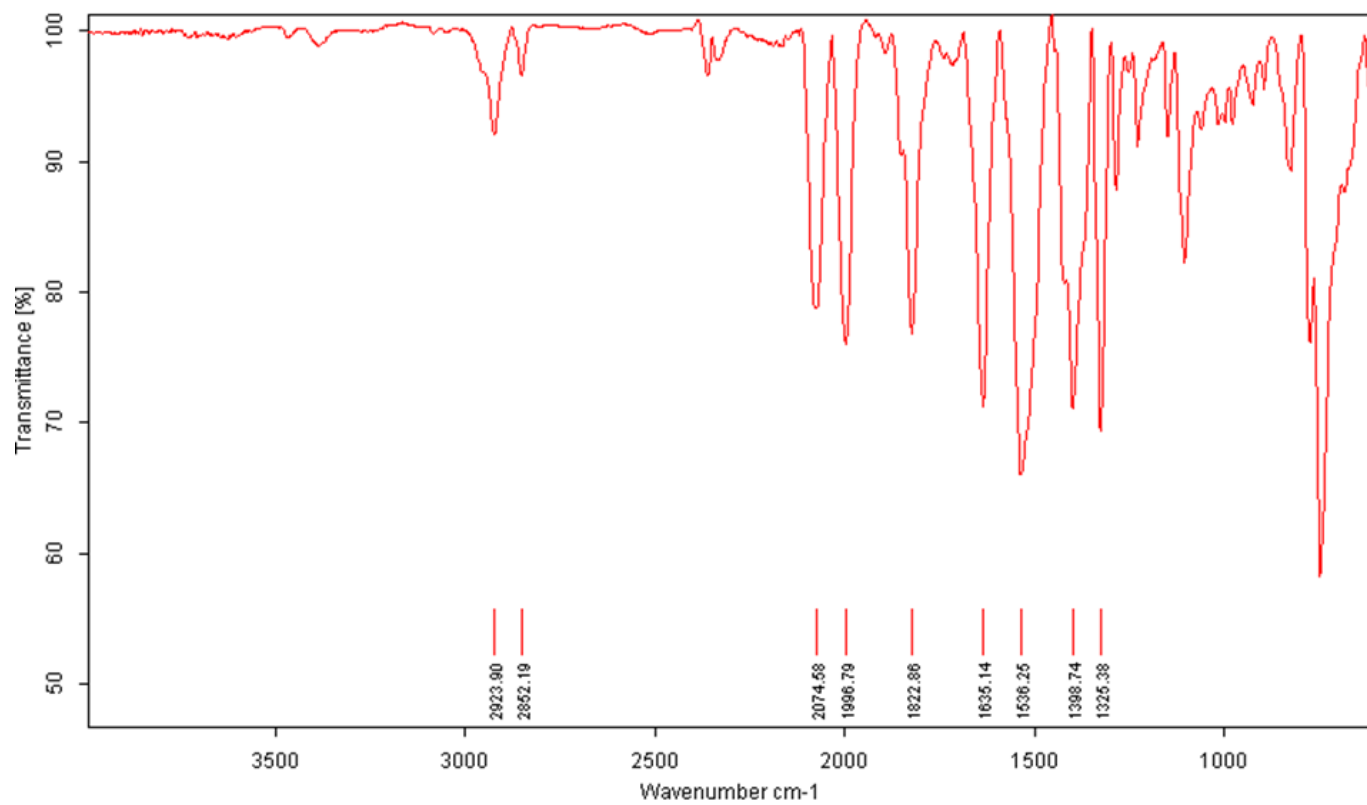

Figure S3: ATR IR spectrum of  $[\text{Rh}(\text{indol})(\text{CO})_2]$  (B1)

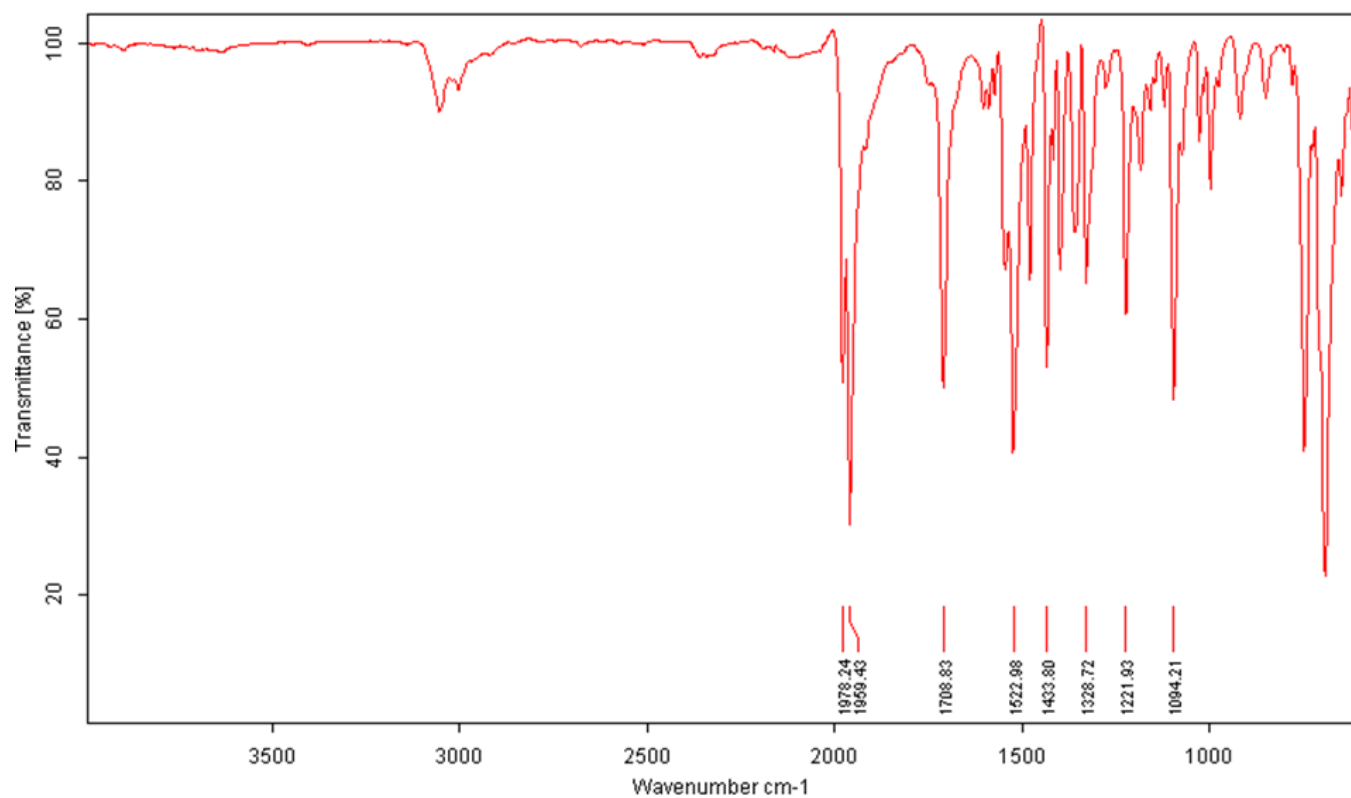

Figure S4: ATR IR spectrum of  $[\text{Rh}(\text{indol})(\text{CO})(\text{PPh}_3)\text{Rh}(\text{CO})(\text{PPh}_3)_2]$  (B2)

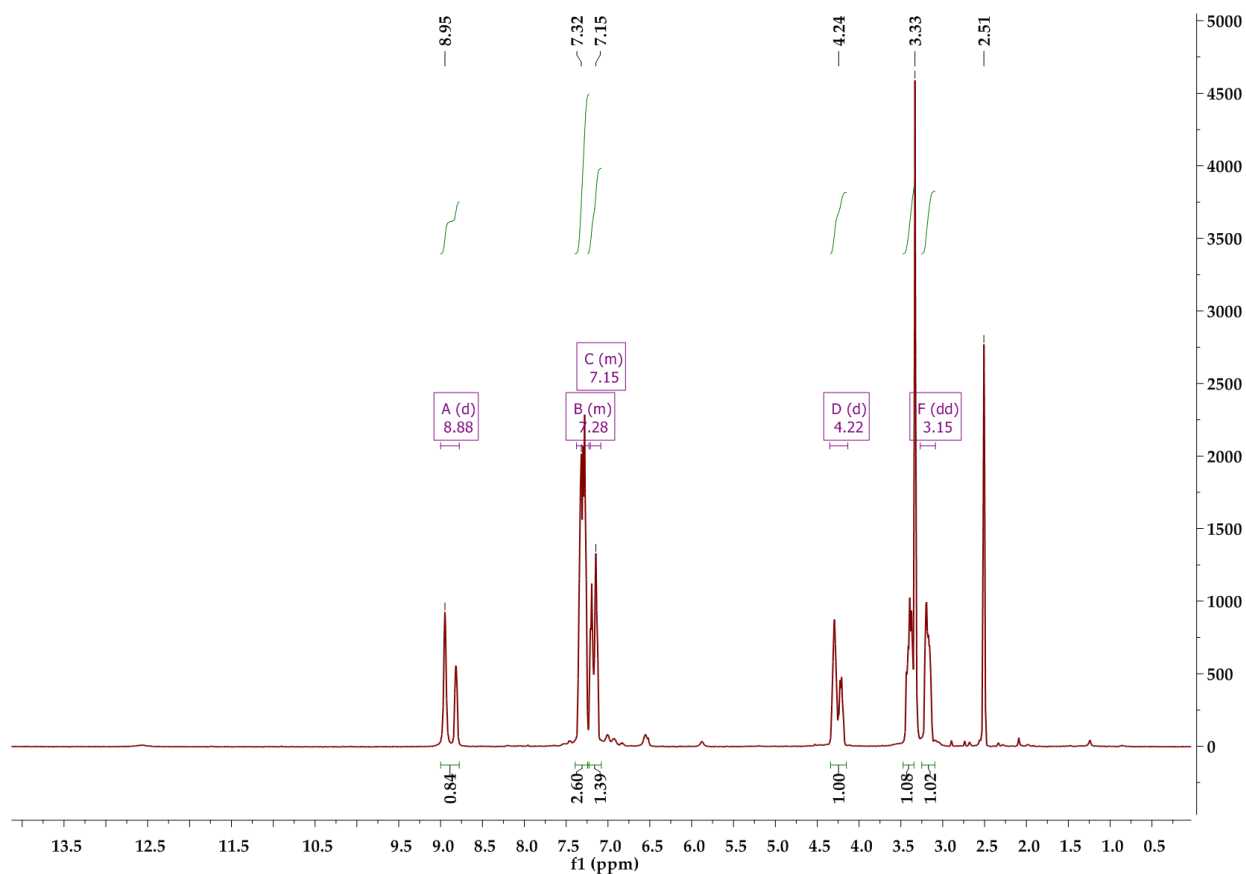

Figure S5: <sup>1</sup>H NMR spectrum (DCM) of [Rh(indoli)(CO)<sub>2</sub>] (A1)

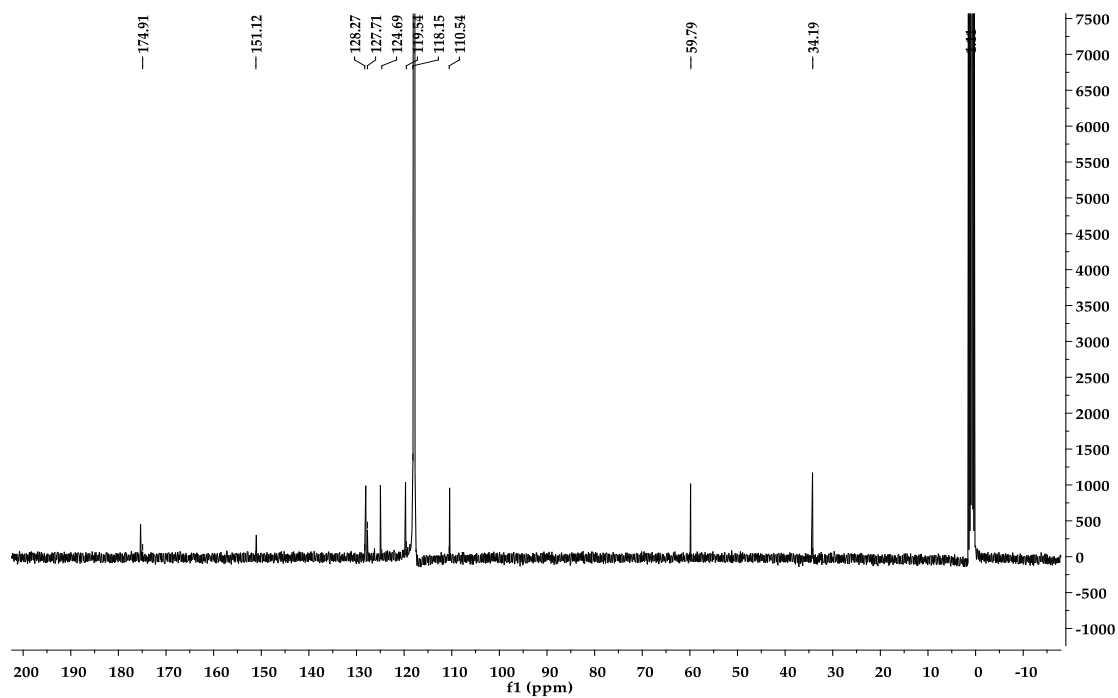

Figure S6: <sup>13</sup>C NMR spectrum of the IndoliH ligand in Acetonitrile d<sub>3</sub>. The signals 1.1 and 118.2 refer to the deuterated acetonitrile solvent.

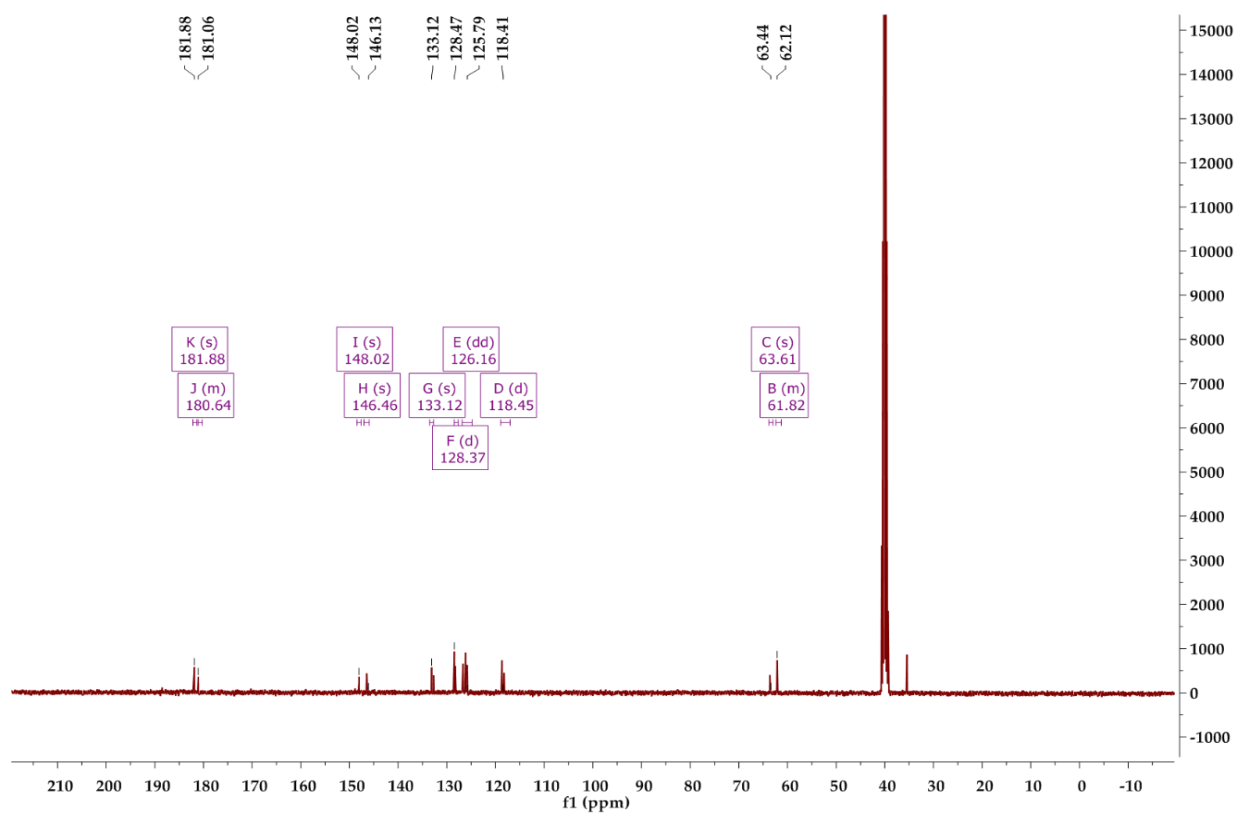

Figure S7:  $^{13}\text{C}$  NMR spectrum (DCM) of  $[\text{Rh}(\text{indoli})(\text{CO})_2]$  (A1)

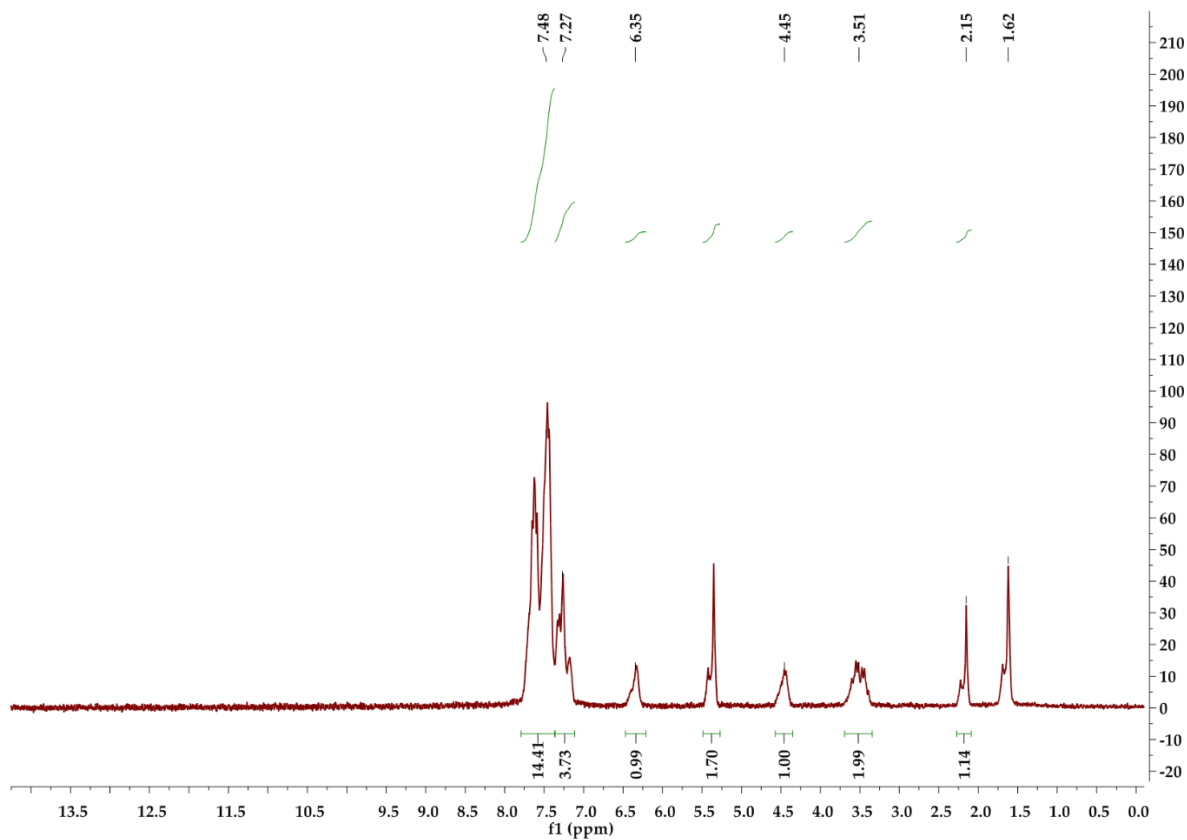

Figure S8:  $^1\text{H}$  NMR spectrum (DCM) of  $[\text{Rh}(\text{indoli})(\text{CO})(\text{PPh}_3)]$  (A2)

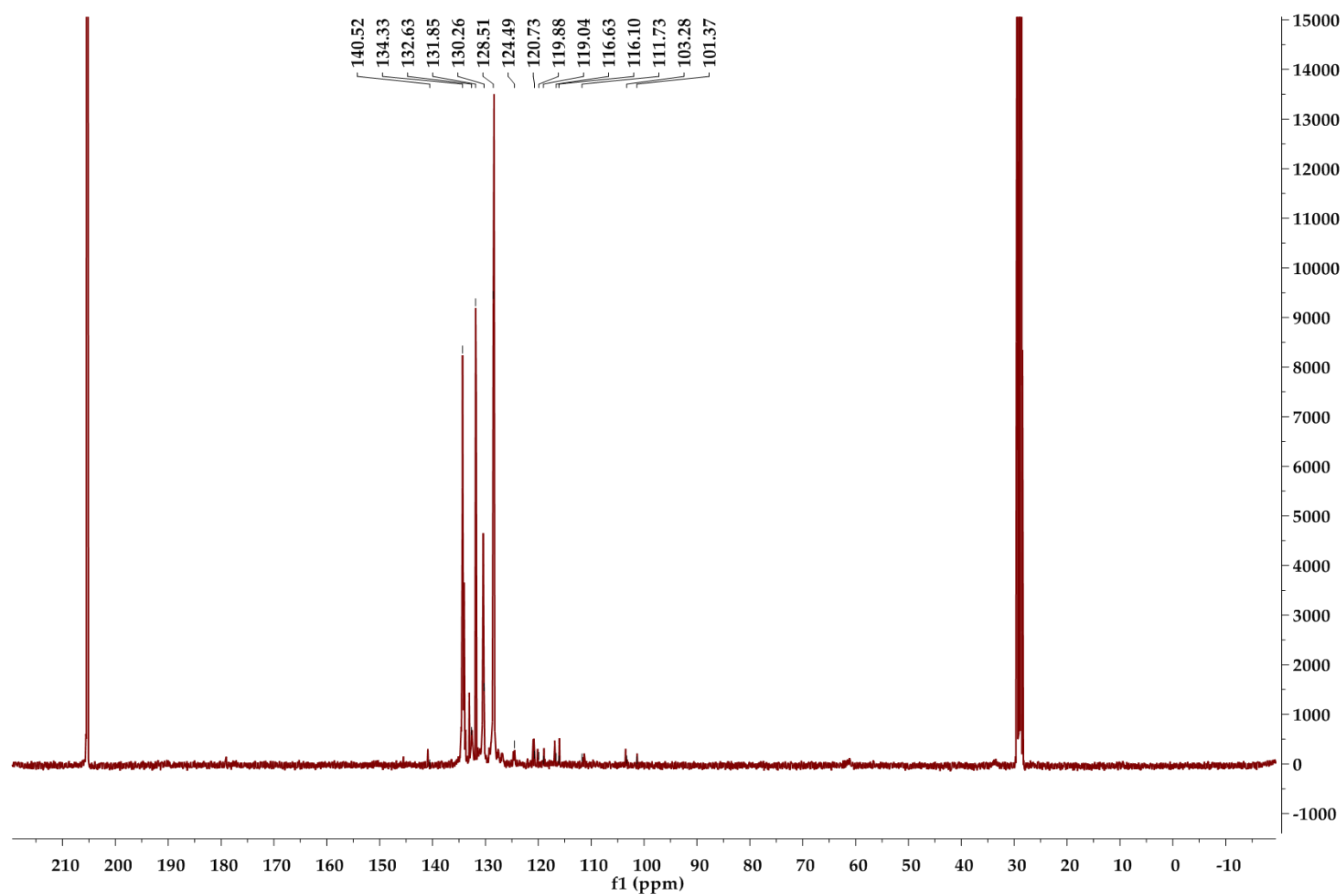

Figure S9:  $^{13}\text{C}$  NMR spectrum (Acetone- $\text{d}_6$ ) of  $[\text{Rh}(\text{indoli})(\text{CO})(\text{PPh}_3)]$  (A2)

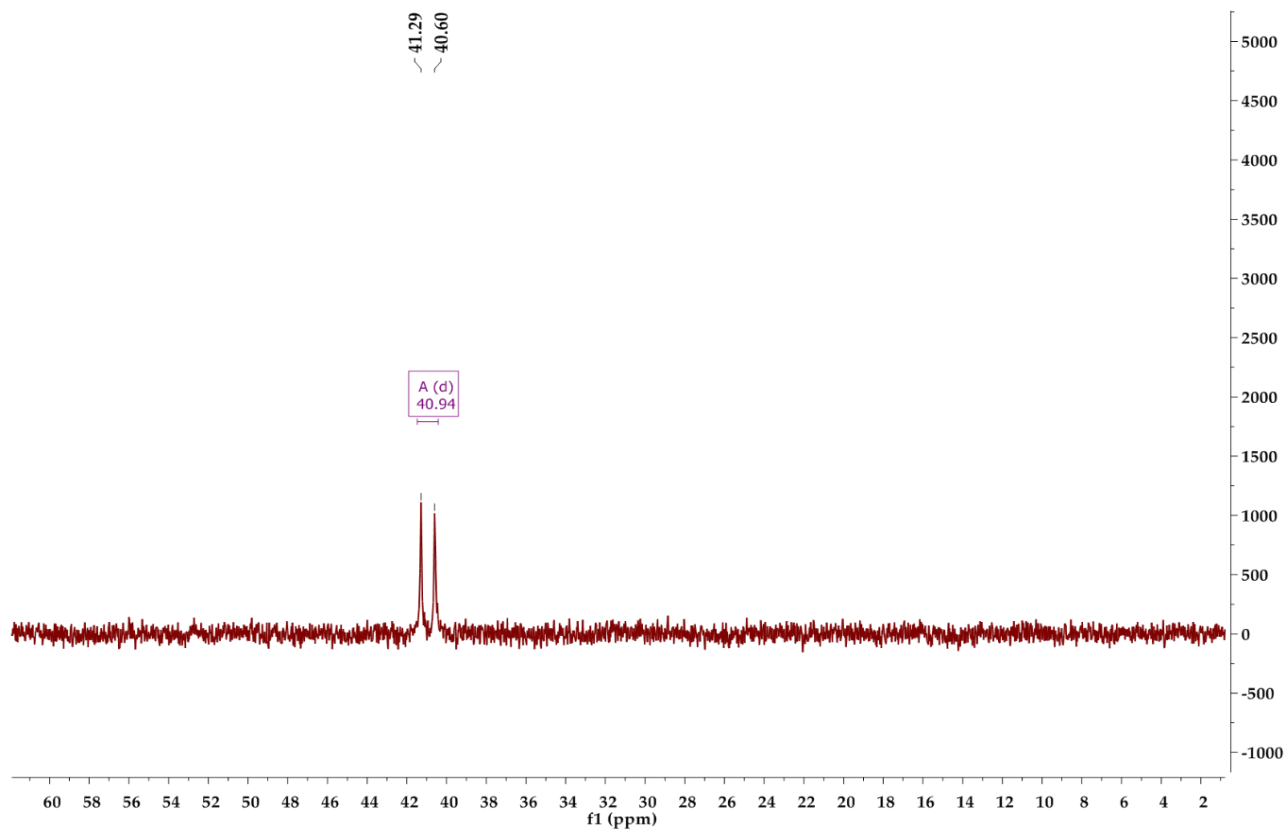

Figure S10:  $^{31}\text{P}$  NMR spectrum (DCM) of  $[\text{Rh}(\text{indoli})(\text{CO})(\text{PPh}_3)]$  (A2)

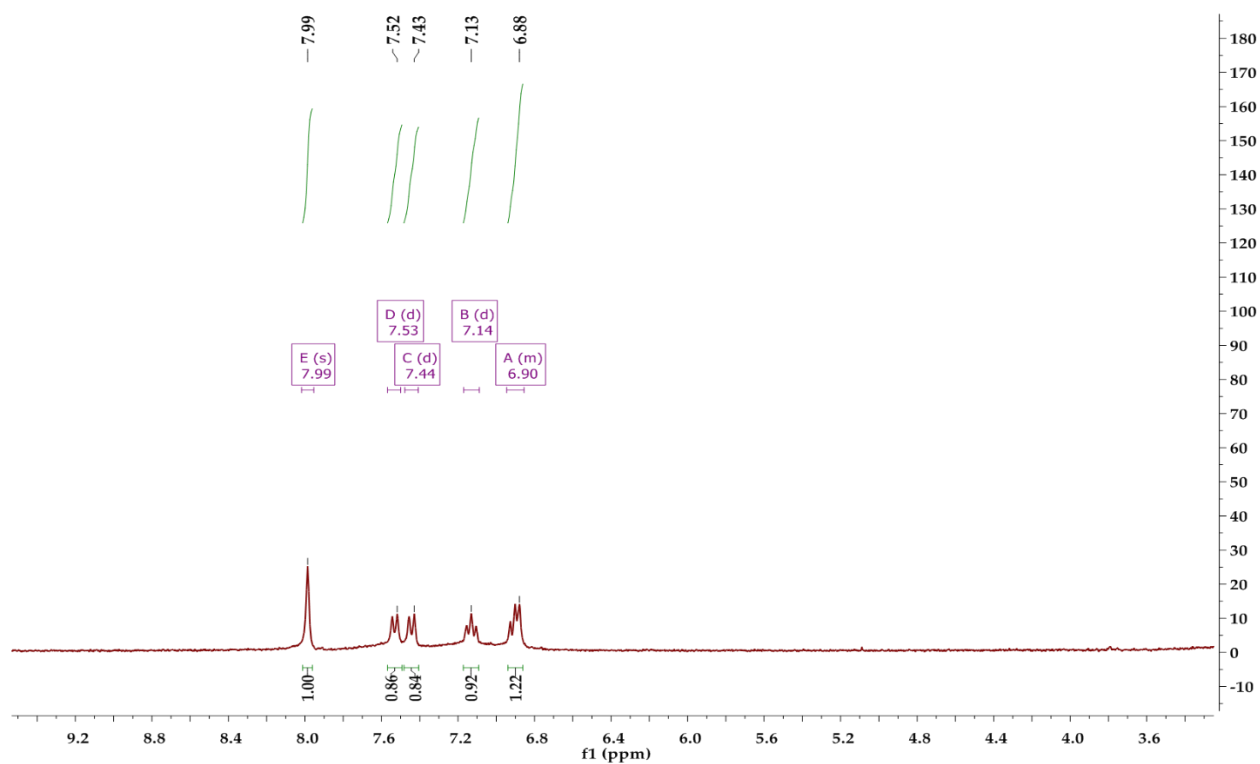

Figure S11: <sup>1</sup>H NMR spectrum (DCM) of [Rh(indol)(CO)<sub>2</sub>] (B1)

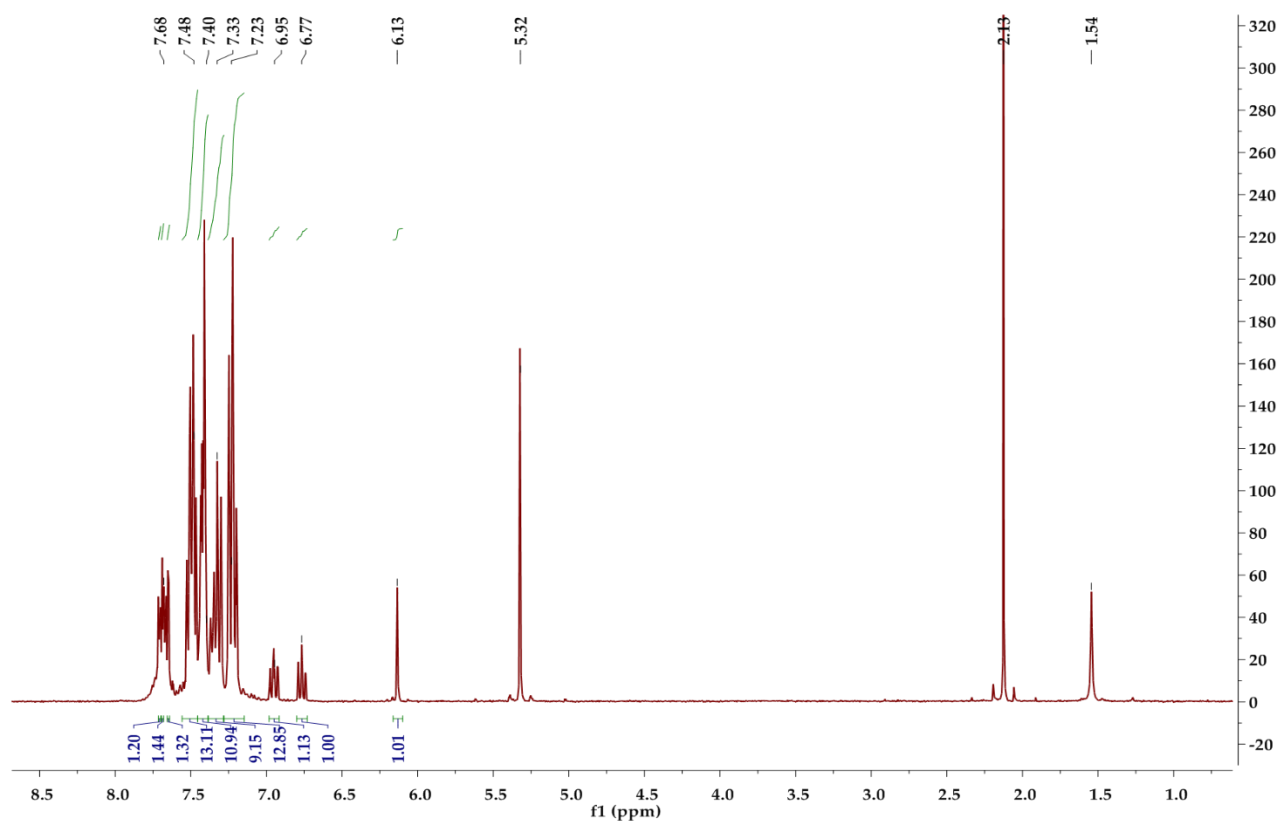

Figure S12: <sup>1</sup>H NMR spectrum (DCM) of [Rh(indol')(CO)(PPh<sub>3</sub>)Rh(CO)(PPh<sub>3</sub>)<sub>2</sub>] (B2)

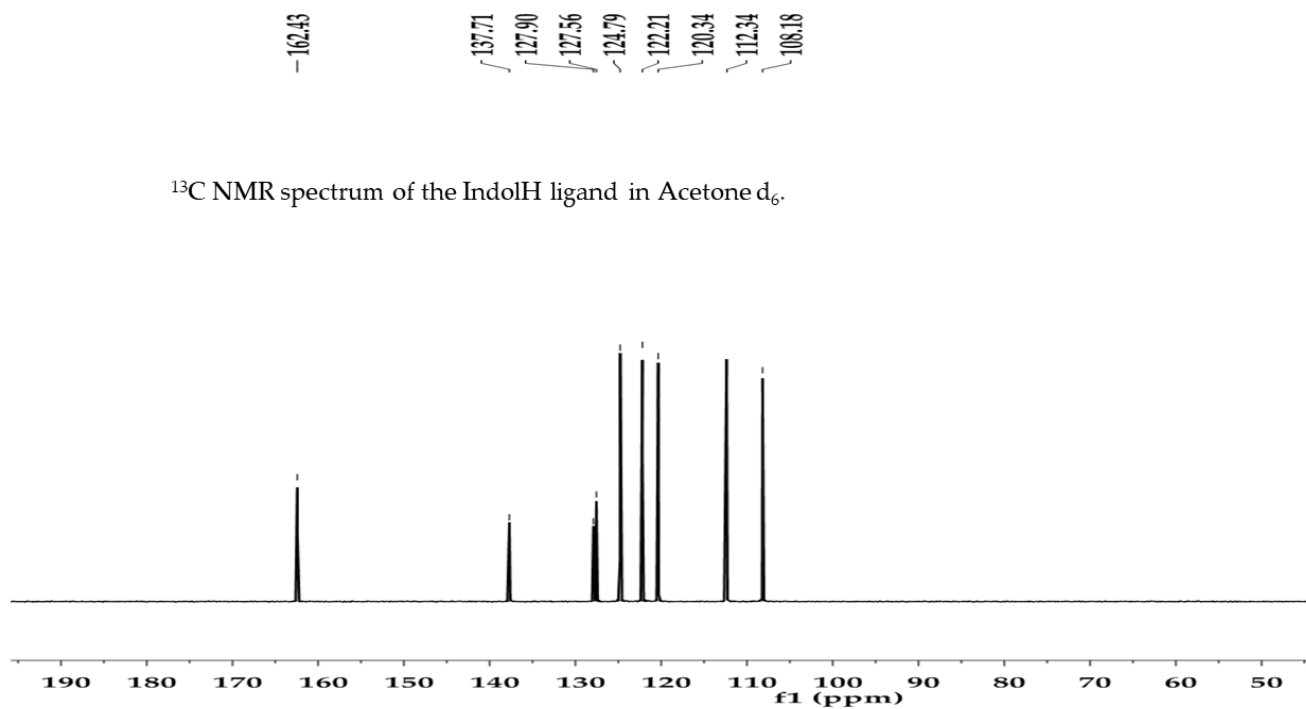

Figure S13: <sup>13</sup>C NMR spectrum (Acetone-d<sub>6</sub>) of IndolH

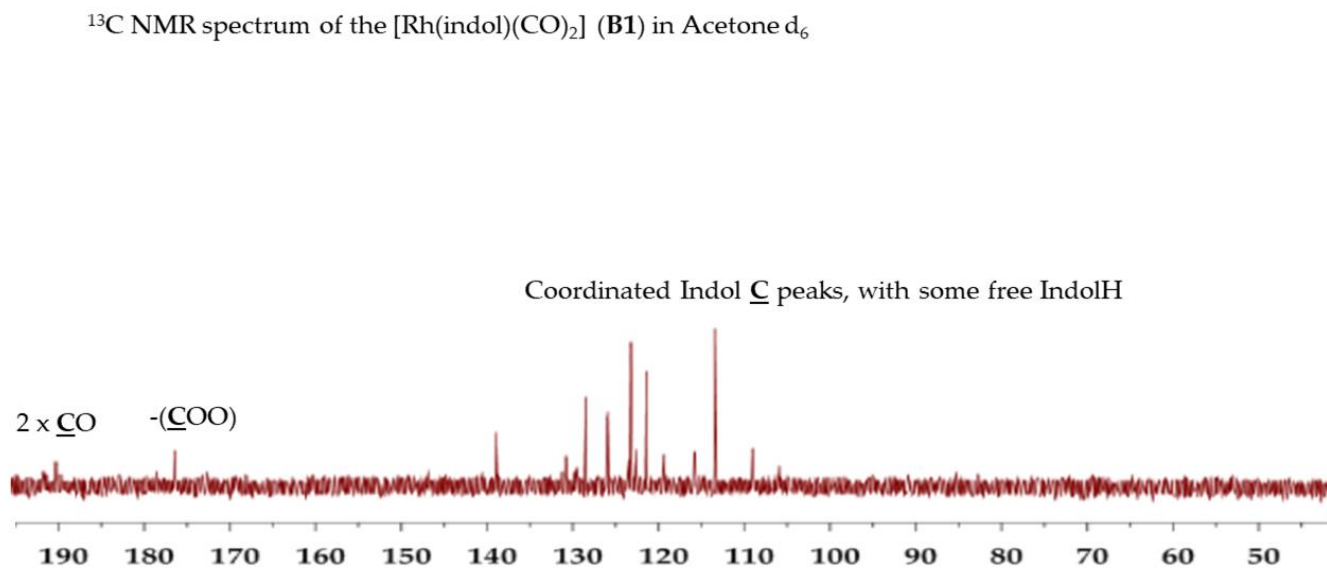

Figure S14: <sup>13</sup>C NMR spectrum (Acetone-d<sub>6</sub>) of [Rh(indol)(CO)<sub>2</sub>] (B1)

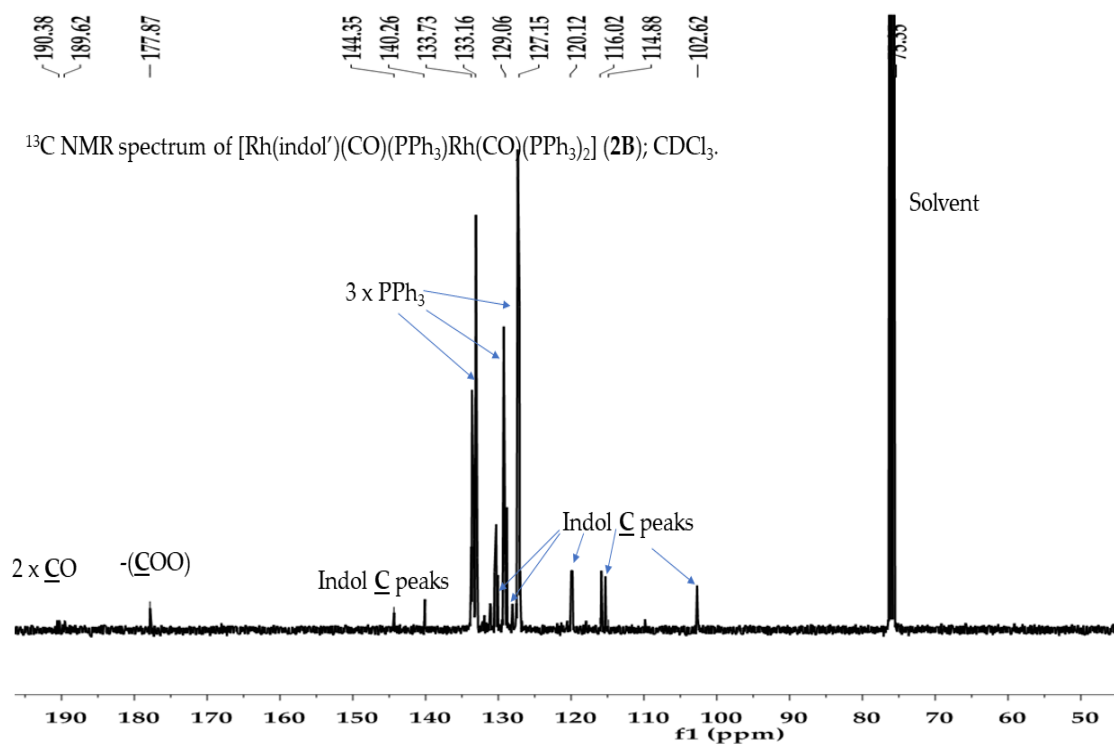

Figure S15: <sup>13</sup>C NMR spectrum (CDCl<sub>3</sub>) of [Rh(indol')(CO)(PPh<sub>3</sub>)Rh(CO)(PPh<sub>3</sub>)<sub>2</sub>] (**B2**)

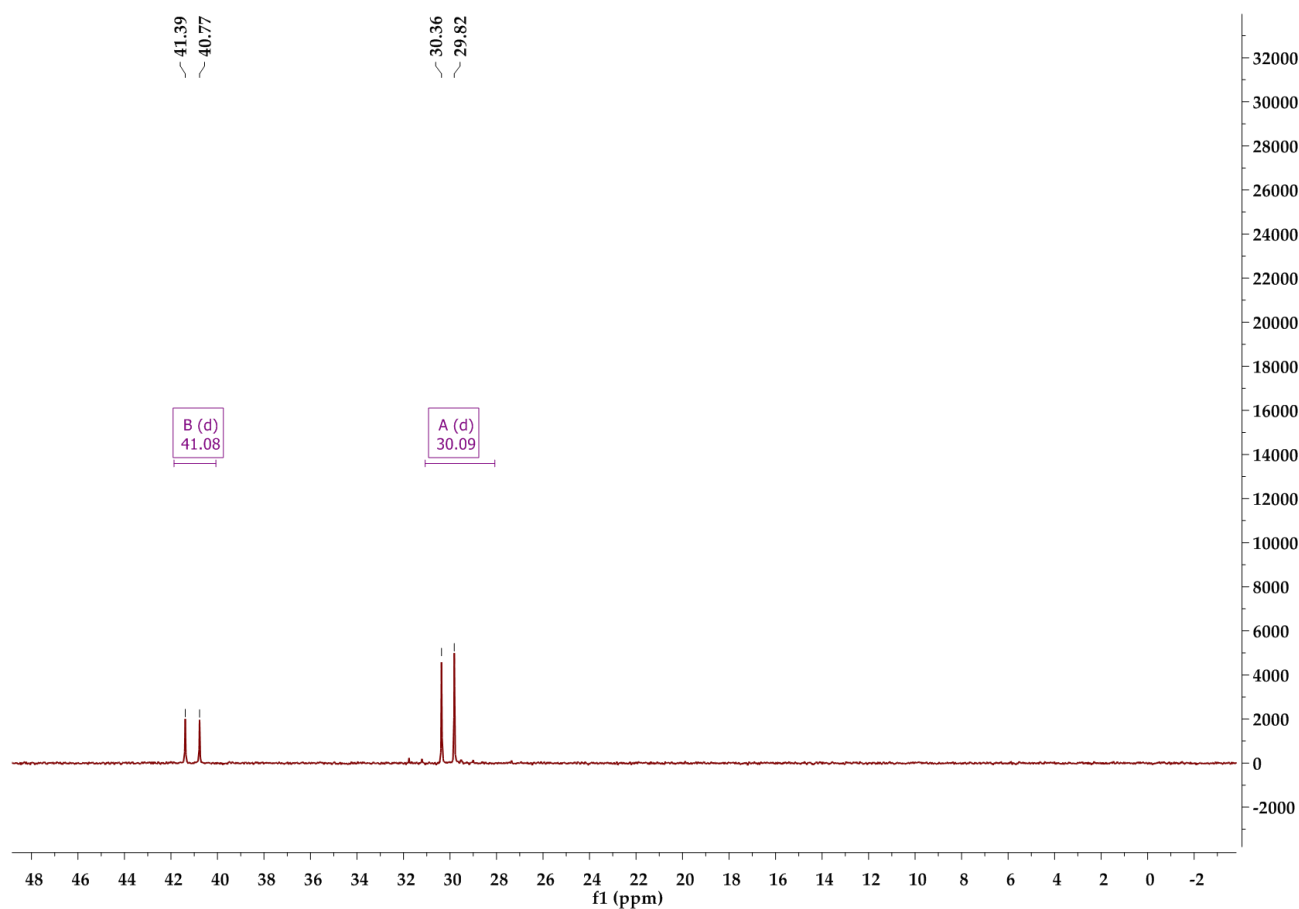

Figure S16: <sup>31</sup>P NMR spectrum (DCM) of [Rh(indol')(CO)(PPh<sub>3</sub>)Rh(CO)(PPh<sub>3</sub>)<sub>2</sub>] (**B2**)

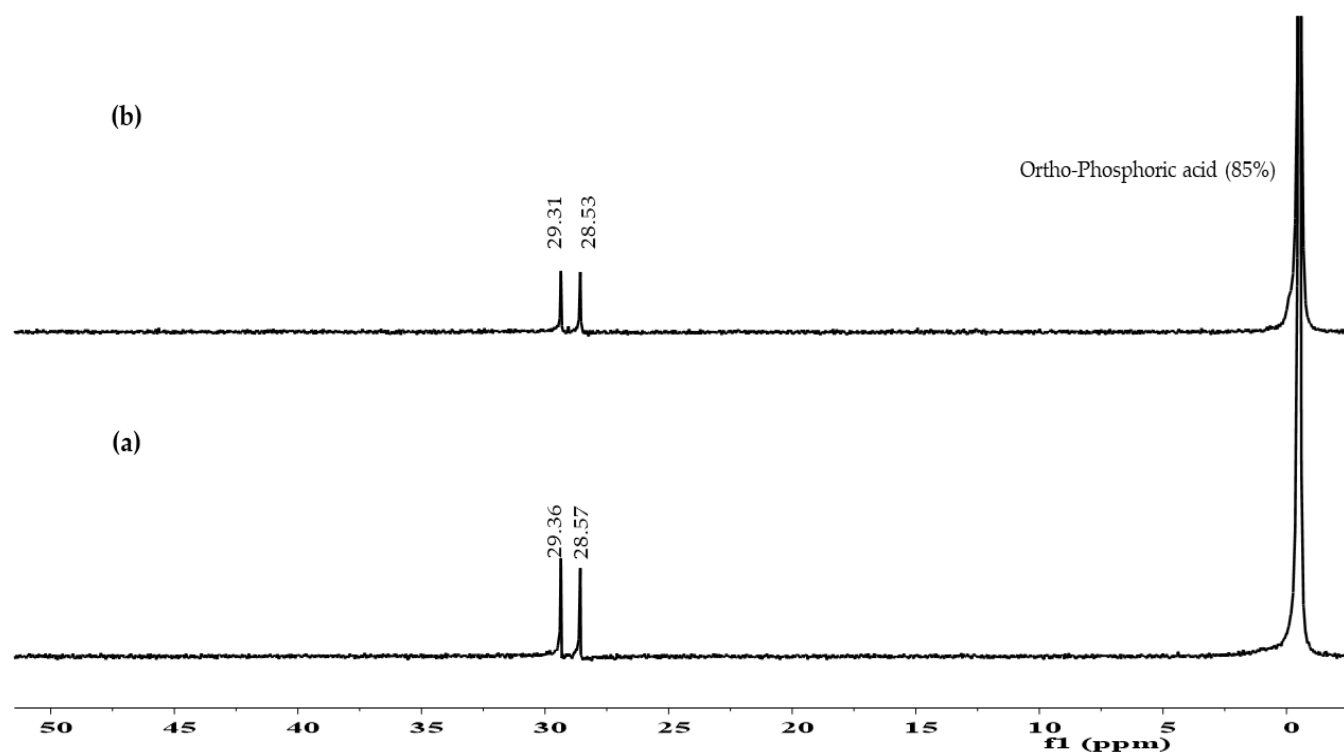

Figure S17:  $^{31}\text{P}$  NMR spectrum (DCM) of (a)  $\text{trans-}[\text{RhI}(\text{CO})(\text{PPh}_3)_2]$  (B4) and (b)  $\text{trans-}[\text{RhCl}(\text{CO})(\text{PPh}_3)_2]$

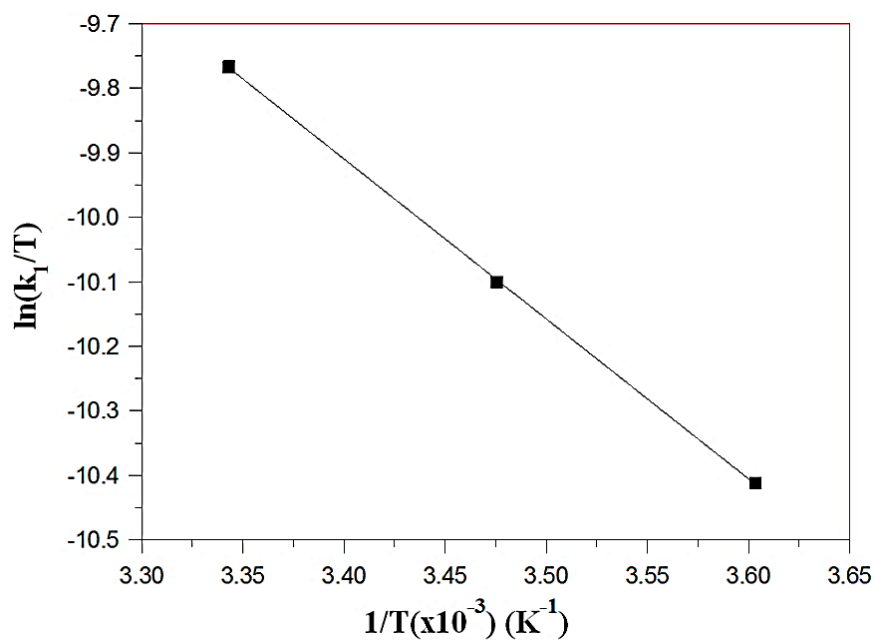

Figure S18: Eyring plot:  $k_1$  rate constant (DCM): iodomethane oxidative addition to  $[\text{Rh}(\text{indoli})(\text{CO})(\text{PPh}_3)]$  (A2).

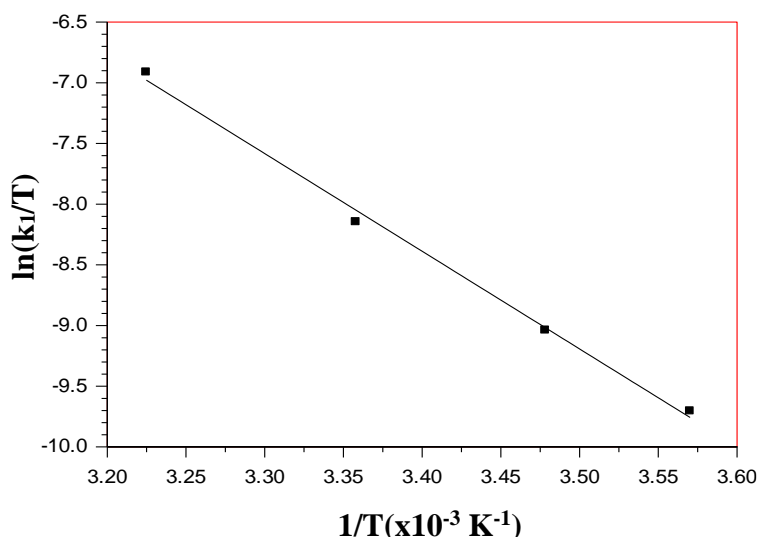

Figure S19: Eyring plot: OA  $k_1$  rate constant to  $[\text{Rh}^1(\text{Indol}')(\text{CO})(\text{PPh}_3)\text{Rh}^2(\text{CO})(\text{PPh}_3)_2]$  (**B2**) in dichloromethane.

**Table S1:** Comparison of selected crystallographic data in  $[\text{Rh}^1(\text{Indol}')(\text{CO})(\text{PPh}_3)\text{Rh}^2(\text{CO})(\text{PPh}_3)_2].(\text{CH}_3\text{COCH}_3)$  (**B2a**) with an isostructural thiourea molecule reported by Kemp et al. [Ref see ms]

| Complex                               | $[\text{Rh}^1(\text{Indol}')(\text{CO})(\text{PPh}_3)\text{Rh}^2(\text{CO})(\text{PPh}_3)_2].(\text{CH}_3\text{COCH}_3)$ ( <b>B2a</b> ) | $[\text{Rh}(\text{nbnpt})(\text{CO})(\text{PPh}_3)\text{Rh}(\text{CO})(\text{PPh}_3)_2].(\text{CH}_3\text{COCH}_3)$ <sup>a)</sup> |
|---------------------------------------|-----------------------------------------------------------------------------------------------------------------------------------------|-----------------------------------------------------------------------------------------------------------------------------------|
| <b>Bond length (Å)</b>                |                                                                                                                                         |                                                                                                                                   |
| Rh1-P1                                | 2.2626(14)                                                                                                                              | 2.275(3)                                                                                                                          |
| Rh2-P2                                | 2.3355(14)                                                                                                                              | 2.328(3)                                                                                                                          |
| Rh2-P3                                | 2.3415(14)                                                                                                                              | 2.330(3)                                                                                                                          |
| Rh1-C                                 | 1.784(5)                                                                                                                                | 1.773(1)                                                                                                                          |
| Rh2-C                                 | 1.800(6)                                                                                                                                | 1.744(1)                                                                                                                          |
| O1...N1 (Bite distance)               | 2.654(1)                                                                                                                                | -                                                                                                                                 |
| Peripheral H-H distance <sup>b)</sup> | 16.90(3)                                                                                                                                | -                                                                                                                                 |
| <b>Bond angle (°)</b>                 |                                                                                                                                         |                                                                                                                                   |
| P1-Rh1-C                              | 90.07(17)                                                                                                                               | 89.7(4)                                                                                                                           |
| P2-Rh2-C                              | 91.37(16)                                                                                                                               | 88.6(4)                                                                                                                           |
| P3-Rh2-C                              | 86.54(16)                                                                                                                               | 88.5(4)                                                                                                                           |
| P2-Rh2-P3                             | 171.80(5)                                                                                                                               | 174.78(1)                                                                                                                         |
| <b>Crystal system</b>                 | Triclinic                                                                                                                               | Monoclinic                                                                                                                        |
| <b>Space group</b>                    | $P\bar{1}$                                                                                                                              | $P2_1/c$                                                                                                                          |
| <b>Unit cell dimensions</b>           |                                                                                                                                         |                                                                                                                                   |
| <b>Temperature (° K)</b>              | 100                                                                                                                                     | 298                                                                                                                               |
| $a$ (Å)                               | 14.097(2)                                                                                                                               | 12.282(3)                                                                                                                         |
| $b$ (Å)                               | 14.280(2)                                                                                                                               | 26.539(5)                                                                                                                         |
| $c$ (Å)                               | 17.942(3)                                                                                                                               | 20.079(4)                                                                                                                         |
| $\alpha$ (°)                          | 93.451(6)                                                                                                                               | 90                                                                                                                                |
| $\beta$ (°)                           | 112.987(5)                                                                                                                              | 100.20(2)                                                                                                                         |
| $\gamma$ (°)                          | 115.164(6)                                                                                                                              | 90                                                                                                                                |
| $Z$                                   | 2                                                                                                                                       | 4                                                                                                                                 |
| Volume (Å <sup>3</sup> )              | 2896.4(8)                                                                                                                               | 6441(2)                                                                                                                           |

a) nbnpt = *N*-benzoyl-*N'*-phenylthiourea anion [Ref see ms]; b) H14--H94 distance; outermost H-atoms on periphery of **B2**, and when including the H-atom radii, total distance is > 1.7 nm

**Table S2:** Comparison of geometric parameters and crystal data of *trans*-[Rh(CO)(I)(PPh<sub>3</sub>)<sub>2</sub>].(CH<sub>3</sub>COCH<sub>3</sub>) (**B5a**) and similar structure found in the literature.

| Complex                     | B5a                     | Basson <i>et al.</i> structure<br>[Ref see ms] |
|-----------------------------|-------------------------|------------------------------------------------|
| <b>Bond length (Å)</b>      |                         |                                                |
| Rh-P1                       | 2.3178(9)               | 2.336 (2)                                      |
| Rh-P1i                      | 2.3178(9)               | 2.316 (2)                                      |
| Rh-I                        | 2.7103(7)               | 2.683 (1)                                      |
| Rh-C                        | 1.725(5)                | 1.81 (1)                                       |
| C-O                         | 0.995(5)                | 1.14 (1)                                       |
| <b>Bond angle (°)</b>       |                         |                                                |
| I-Rh-P1                     | 87.59(3)                | 88.54 (6)                                      |
| I-Rh-P1i                    | 92.40(3)                | 91.19 (6)                                      |
| C-Rh-P1                     | 85.99(18)               | 89.9 (3)                                       |
| C-Rh-Pi                     | 85.99(18)               | 91.0(3)                                        |
| I-Rh-C                      | 176.2(2)                | 176.3(3)                                       |
| <b>Crystal system</b>       | Monoclinic              | Monoclinic                                     |
| <b>Space group</b>          | <i>P2<sub>1</sub>/c</i> | <i>P2<sub>1</sub>/n</i>                        |
| <b>Unit cell dimensions</b> |                         |                                                |
| <i>a</i> (Å)                | 11.974(5)               | 9.823(2)                                       |
| <i>b</i> (Å)                | 20.289(5)               | 15.340(2)                                      |
| <i>c</i> (Å)                | 8.335(5)                | 21.980(3)                                      |
| $\beta$ (°)                 | 98.311(5)               | 95.51(1)                                       |
| <i>Z</i>                    | 2                       | 4                                              |
